# Supplementary material for: Association of High LAT1 Expression with Poor Prognosis and Recurrence in Colorectal Cancer Patients Treated with Oxaliplatin-Based Adjuvant Chemotherapy
Source: MDPI journal article supplement (doi:10.3390/ijms24032604), 2023-01-30
Supplement: s1 [file s1]

# Association of High LAT1 Expression with Poor Prognosis and Recurrence in Colorectal Cancer Patients Treated with Oxaliplatin-Based Adjuvant Chemotherapy

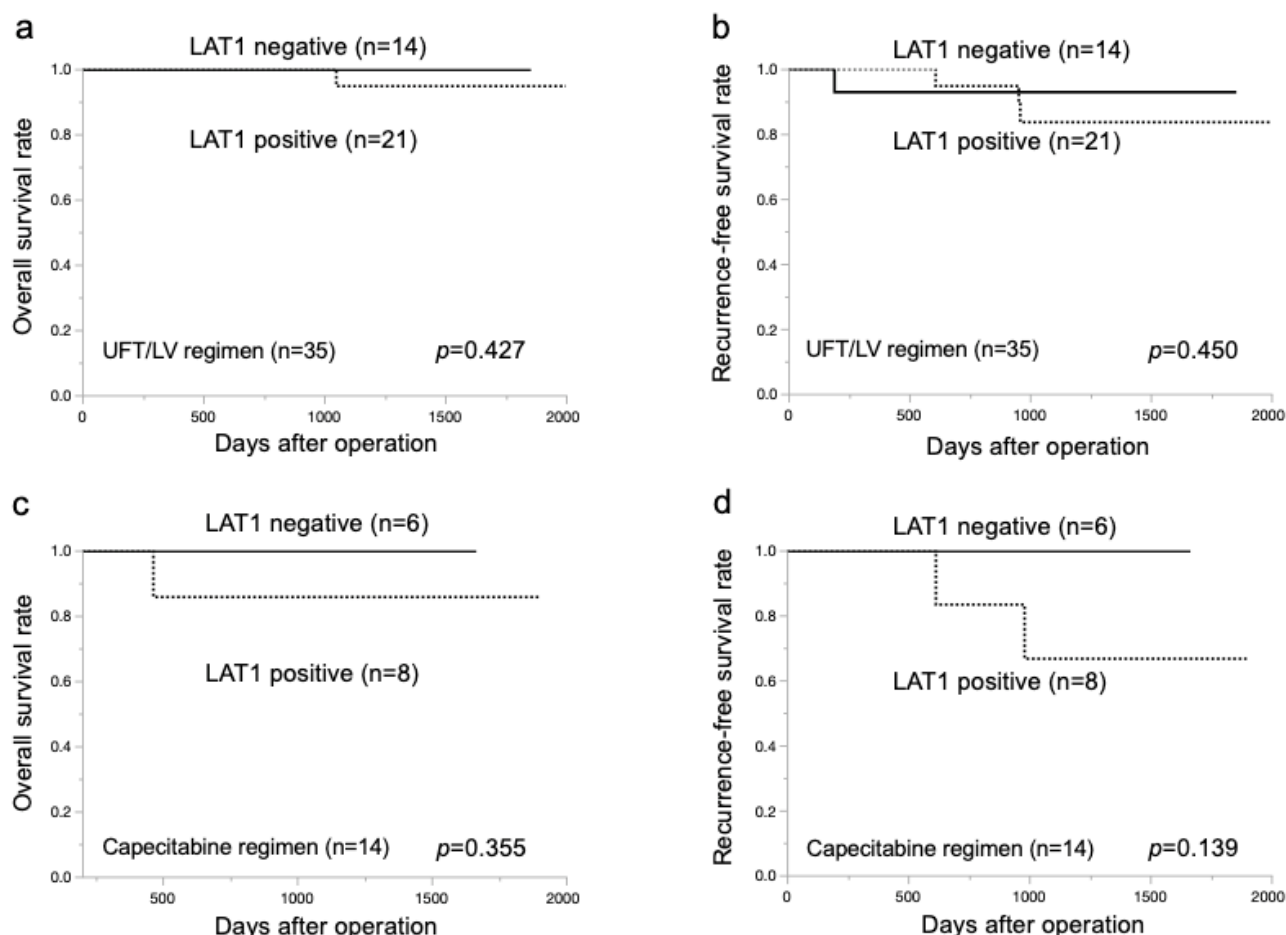

**Figure S1.** Kaplan–Meier survival curves of patients with CRC treated by UFT/LV or capecitabine according to LAT1 expression (a) (b) Kaplan–Meier analysis of overall survival and recurrence-free survival in 35 CRC patients treated by UFT/LV regimen according to LAT1 expression ( $p = 0.4267$  and  $p = 0.45$ , respectively). (c) (d) Kaplan–Meier analyses of overall survival and recurrence-free survival in 14 CRC patients treated with capecitabine according to LAT1 expression ( $p = 0.355$  and  $p = 0.139$ , respectively).

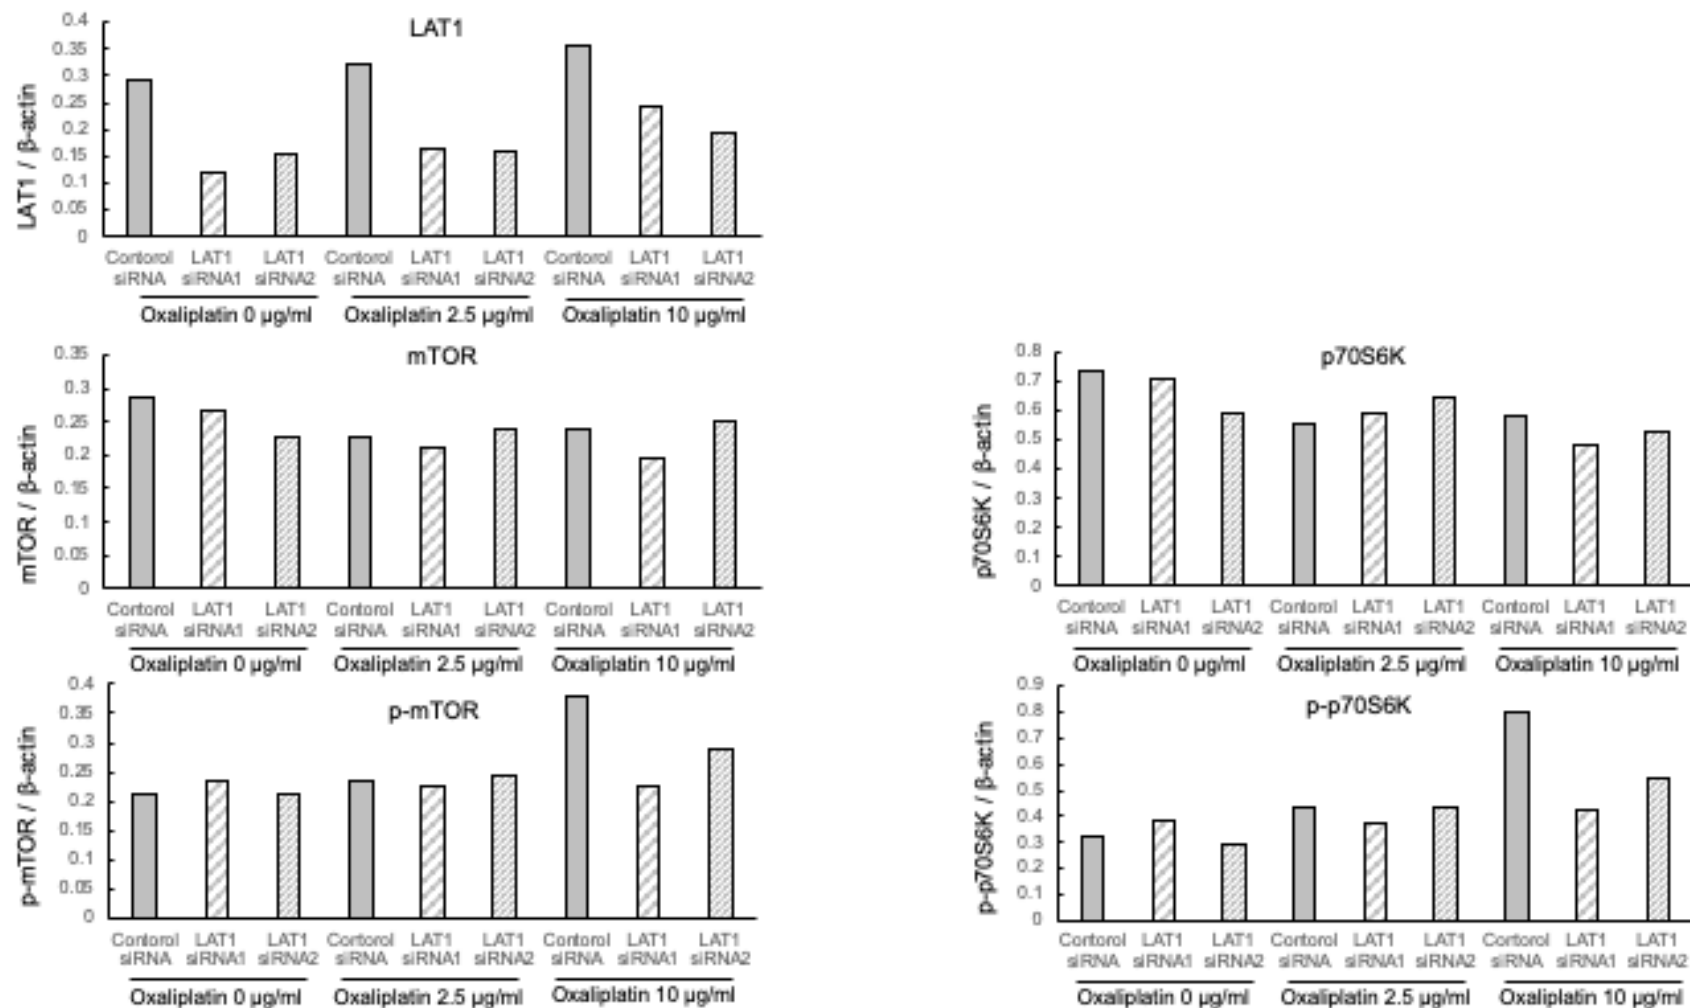

**Figure S2.** Western blot analysis of LAT1, mTOR, p-mTOR, p70S6K, and p-p70S6K in CRC cell lines treated with LAT1 siRNA and oxaliplatin. These proteins were normalized to the level of  $\beta$ -actin expression. The intensity of their blots was measured using ImageJ software (Rasband, W.S., ImageJ, U. S. National Institutes of Health, Bethesda, Maryland, USA).

**Table S1.** Univariate and multivariate analysis of clinicopathological factors affecting recurrence-free survival rate following surgery in 43 CRC patients treated by adjuvant CAPOX.

| Factors             |          | Univariate Analysis |             |                 | Multivariate Analysis |             |                 |
|---------------------|----------|---------------------|-------------|-----------------|-----------------------|-------------|-----------------|
|                     |          | Hazard ratio        | 95% CI      | <i>p</i> -value | Hazard ratio          | 95% CI      | <i>p</i> -value |
| Age                 | 70≥      |                     | Reference   |                 |                       | Reference   |                 |
|                     | 70<      | 3.853               | 1.102-13.48 | 0.035*          | 2.054                 | 0.391-10.80 | 0.395           |
| Sex                 | Male     |                     | Reference   |                 |                       |             |                 |
|                     | Female   | 0.934               | 0.273-3.191 | 0.913           |                       |             |                 |
| Smoking             | Yes      |                     | Reference   |                 |                       |             |                 |
|                     | No       | 0.862               | 0.263-2.825 | 0.806           |                       |             |                 |
| T factor            | T1-3     |                     | Reference   |                 |                       |             |                 |
|                     | T4       | 3.191               | 0.973-10.46 | 0.056           |                       |             |                 |
| N factor            | Absent   |                     | Reference   |                 |                       |             |                 |
|                     | Present  | 640866872           | 0- ·        | 0.999           |                       |             |                 |
| Tumor location      | Right    |                     | Reference   |                 |                       | Reference   |                 |
|                     | Left     | 0.299               | 0.091-0.987 | 0.048*          | 0.508                 | 0.102-2.527 | 0.408           |
| Pathological stage  | II       |                     | Reference   |                 |                       |             |                 |
|                     | III      | 1.84                | 0.234-14.45 | 0.562           |                       |             |                 |
| Histology           | Well     |                     | Reference   |                 |                       |             |                 |
|                     | Not-well | 0.58                | 0.169-1.972 | 0.38            |                       |             |                 |
| Lymphatic invasion  | Absent   |                     | Reference   |                 |                       |             |                 |
|                     | Present  | 599081383           | 0- ·        | 0.999           |                       |             |                 |
| Vascular invasion   | Absent   |                     | Reference   |                 |                       |             |                 |
|                     | Present  | 692416517           | 0- ·        | 0.999           |                       |             |                 |
| Perineural invasion | Absent   |                     | Reference   |                 |                       |             |                 |
|                     | Present  | 2.324               | 0.680-7.946 | 0.179           |                       |             |                 |
| LAT1                | Negative |                     | Reference   |                 |                       | Reference   |                 |
|                     | Positive | 13.32               | 1.685-105.2 | 0.014*          | 12.53                 | 1.549-101.4 | 0.018*          |

CI, confidence interval; \**p*<0.05.
